# Supplementary material
Source: PubMed Central journal article supplement (PMC6207534)
Supplement: NIHMS992189-supplement-1.pdf [file NIHMS992189-supplement-1.pdf]

## SUPPLEMENTARY FIGURES

### Figure S1.

**(a)** Relative expression of pro-fibrotic cytokines measured by real-time quantitative PCR in nodular versus infiltrative human BCC. GAPDH was used for normalization.

**(b)** *In vivo* experimental design.

**(c)** *In vivo* growth of UW\_BCC\_T2/MEF tumors injected intratumorally either with PBS (control) versus recombinant TGF $\beta$  (400ng/inj, 3x/week) and ASZ\_001\_ns/MEF versus ASZ\_001\_TGF $\beta$ shRNA/MEF tumors.

**(d)** Ki67 and cleaved Caspase 3 (undetectable) immunostainings and quantification of Ki67 in UW\_BCC\_T2/MEF tumors injected either with PBS (control) or recombinant TGF $\beta$ .

**(e)** E-cadherin and N-cadherin (undetectable) immunostainings and quantification of E-cadherin in UW\_BCC\_T2/MEF tumors injected either with PBS (control) or recombinant TGF $\beta$ .

**(f)** Western blot and quantification of TGF $\beta$  in ASZ\_001 infected with non-silencing (ns) or TGF $\beta$ 1-targeting (TGF $\beta$ shRNA) shRNA sequences.

Scale bars indicate 25 $\mu$ m. Horizontal bars or columns and error bars represent the mean  $\pm$  SD for  $n \geq 5$  per group. \* $p < 0.01$  and \*\* $p < 0.01$ .

Figure S1

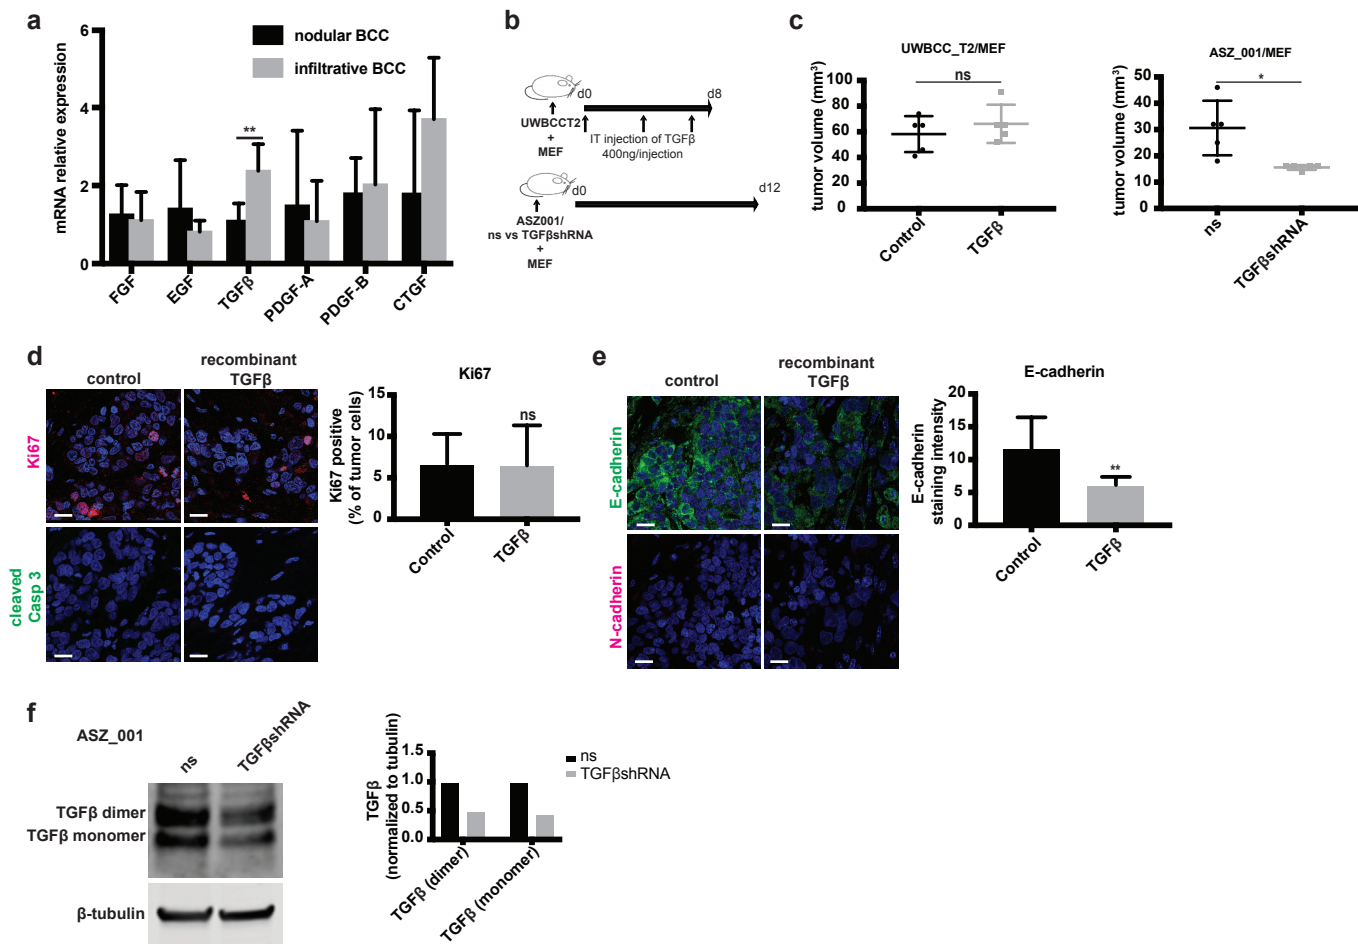

**Figure S2.**

**(a)** Migration timecourse of UW\_BCC\_T2 on fibronectin when treated with either DMSO (control) or K34C (10 $\mu$ M and 20 $\mu$ M respectively).

**(b)** Migration timecourse of ASZ\_001 on fibronectin when treated with either DMSO (control) or K34C (10 $\mu$ M and 20 $\mu$ M respectively).

**(c)** Migration timecourse of UW\_BCC\_T2 on fibronectin when treated either with isotype (control) or P1D6 (10 $\mu$ g/ml) antibodies.

**(d)** *In vitro* growth curve of UW\_BCC\_T2 on fibronectin when treated either with DMSO (control) or K34C inhibitor (10 $\mu$ M and 20 $\mu$ M respectively). Cell density was assessed using Chalkley score analysis.

**(e)** *In vitro* growth curve of ASZ\_001 on fibronectin when treated either with DMSO (control) or K34C inhibitor (10 $\mu$ M and 20 $\mu$ M respectively). Cell density was assessed using Chalkley score analysis.

**(f)** *In vitro* growth curve of UW\_BCC\_T2 on fibronectin when treated either with isotype (control) or P1D6 (10 $\mu$ g/ml) antibodies. Cell density was assessed using Chalkley score analysis.

Figure S2

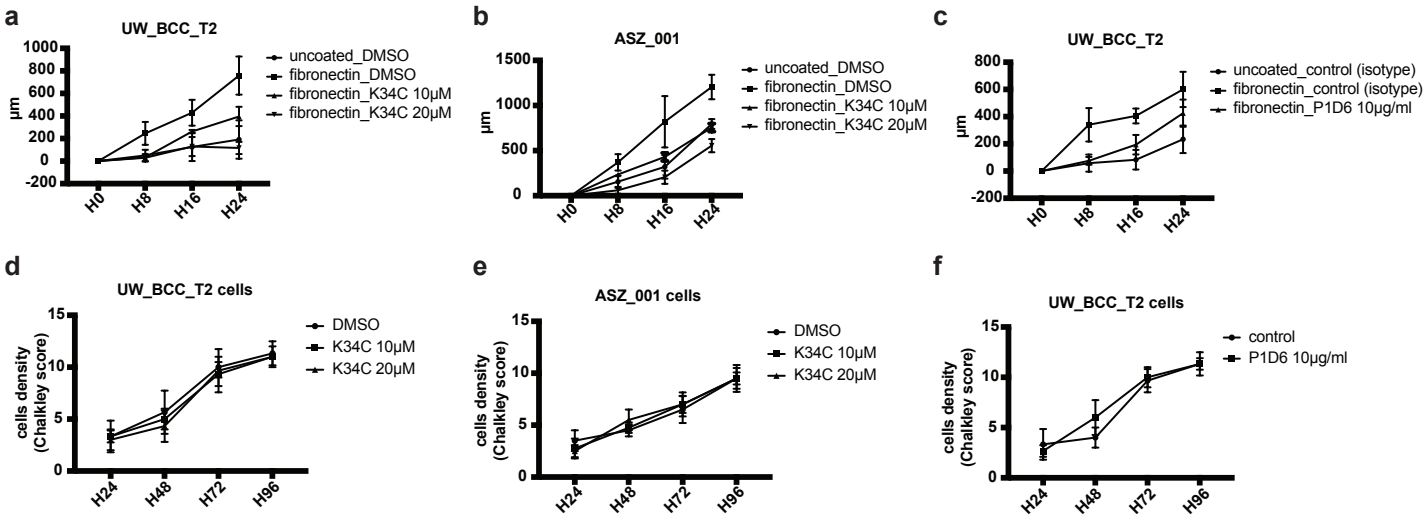

**Figure S3.**

**(a)** Quantification of p-FAK(Y397) normalized to total FAK (loading control) measured by Western blot in UW\_BCC\_T2 and ASZ\_001 when plated on poly-L-lysine (control) or fibronectin in the presence of DMSO (control) or K34C inhibitor (20  $\mu$ M).

**(b)** Quantification of p-FAK(Y397) normalized to total FAK (loading control) measured by Western blot in UW\_BCC\_T2 when plated on poly-L-lysine (control) or fibronectin in the presence of isotype (control) or P1D6 (10 $\mu$ g/ml) antibodies.

Figure S3

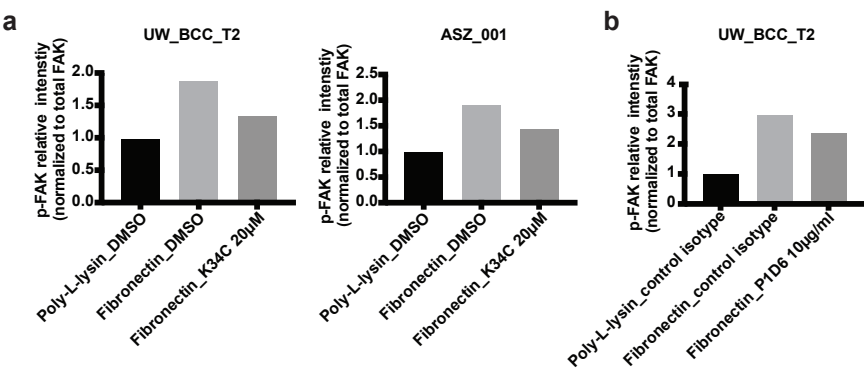

**Figure S4.**

**(a)** Western blot for total FAK and  $\beta$ -tubulin in UW\_BCC\_T2 and ASZ\_001 infected with non-silencing (ns) or FAK-targeting (FAKshRNA) shRNA sequences.

**(b)** Quantification of total FAK normalized to  $\beta$ -tubulin (loading control) measured by Western blot in (a).

**(c)** Migration timecourse of UW\_BCC\_T2\_ns versus UW\_BCC\_T2\_FAKshRNA and ASZ\_001\_ns versus ASZ\_001\_FAKshRNA on uncoated versus fibronectin-coated dishes.

**(d)** *In vitro* growth curve of UW\_BCC\_T2\_ns versus UW\_BCC\_T2\_FAKshRNA and ASZ\_001\_ns versus ASZ\_001\_FAKshRNA on fibronectin. Cell density was assessed using Chalkley score analysis.

**(e)** *In vivo* experimental design.

**(f)** *In vivo* growth of UW\_BCC\_T2\_ns/MEF versus UW\_BCC\_T2\_FAKshRNA/MEF tumors injected either with PBS (control) or recombinant TGF $\beta$  (400ng/inj, 3x/week).

**(g)** *In vivo* growth of ASZ\_001\_ns/MEF versus ASZ\_001\_FAKshRNA/MEF tumors.

Horizontal bars represent the mean  $\pm$  SD for n = 5 per group. \*p < 0.01 and \*\*\*p < 0.001.

**Figure S4**

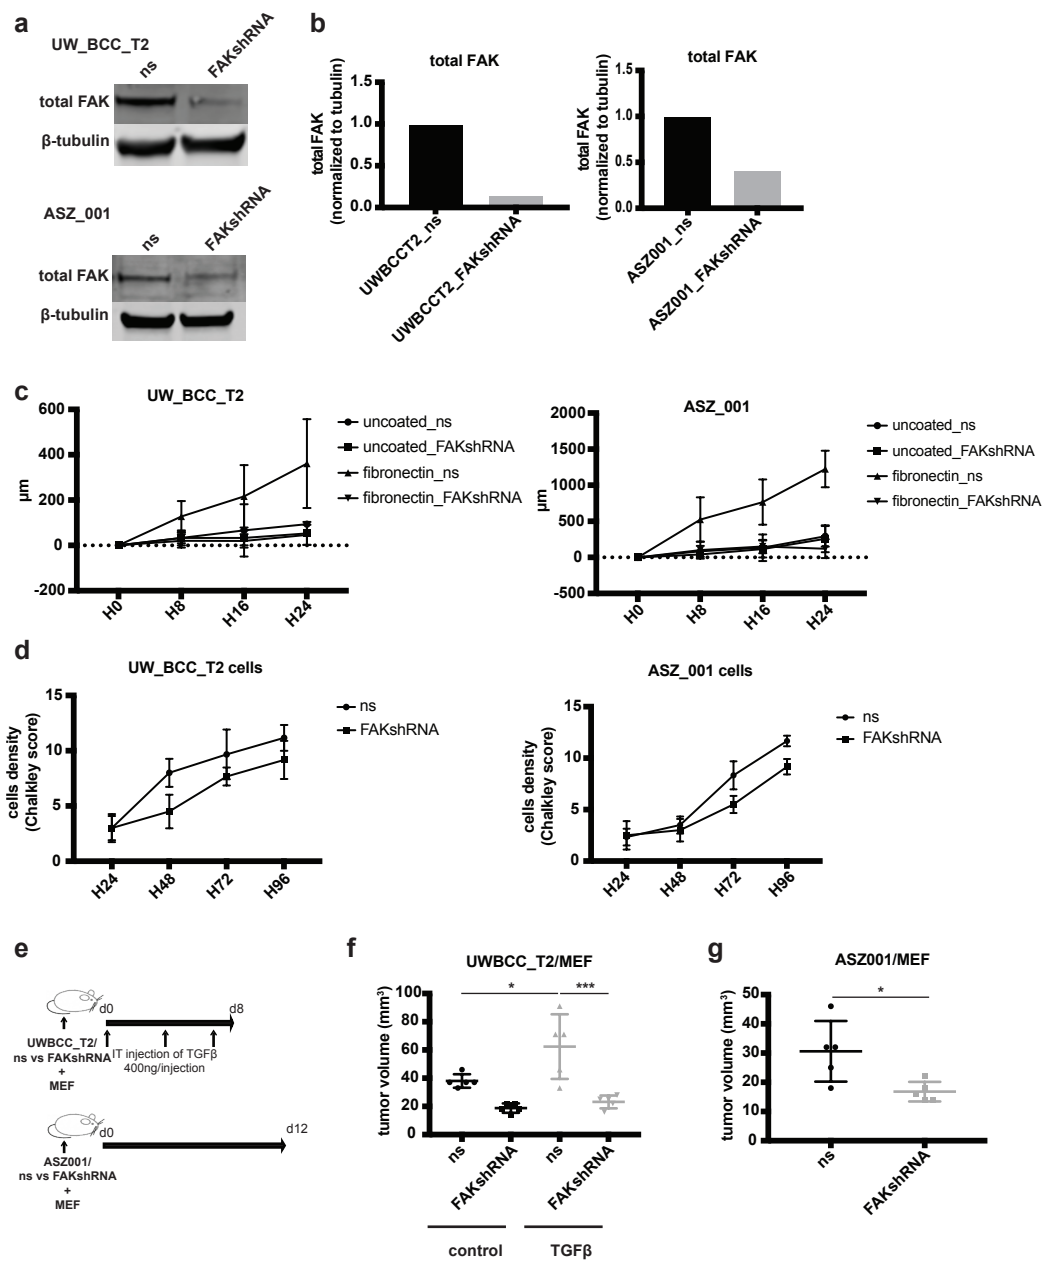

**Figure S5.**

**(a)** Migration timecourse of UW\_BCC\_T2 and ASZ\_001 on fibronectin when treated either with DMSO (control) or PF-562271 inhibitor (1 $\mu$ M and 10 $\mu$ M respectively).

**(b)** *In vitro* growth curve of UW\_BCC\_T2 and ASZ\_001 on fibronectin when treated either with DMSO (control) or PF-562271 inhibitor (1 $\mu$ M and 10 $\mu$ M respectively). Cell density was assessed using Chalkley score analysis.

**(c)** *In vivo* experimental design.

**(d)** *In vivo* growth of UW\_BCC\_T2/MEF tumors injected either with PBS or recombinant TGF $\beta$  (400ng/injection, 3x/week) and simultaneously treated with either DMSO (control), PF-562271 inhibitor (50mg/kg, 1x/day) or K34C (50 $\mu$ l at 20 $\mu$ M).

**(e)** *In vivo* growth of ASZ\_001/MEF tumors treated with either DMSO (control), PF-562271 inhibitor (50mg/kg, 1x/day) or K34C (50 $\mu$ l at 20 $\mu$ M).

Horizontal bars represent the mean  $\pm$  SD for n = 5 per group. \*p < 0.01 and \*\*\*p < 0.001. ns stands for non-significant.

Figure S5

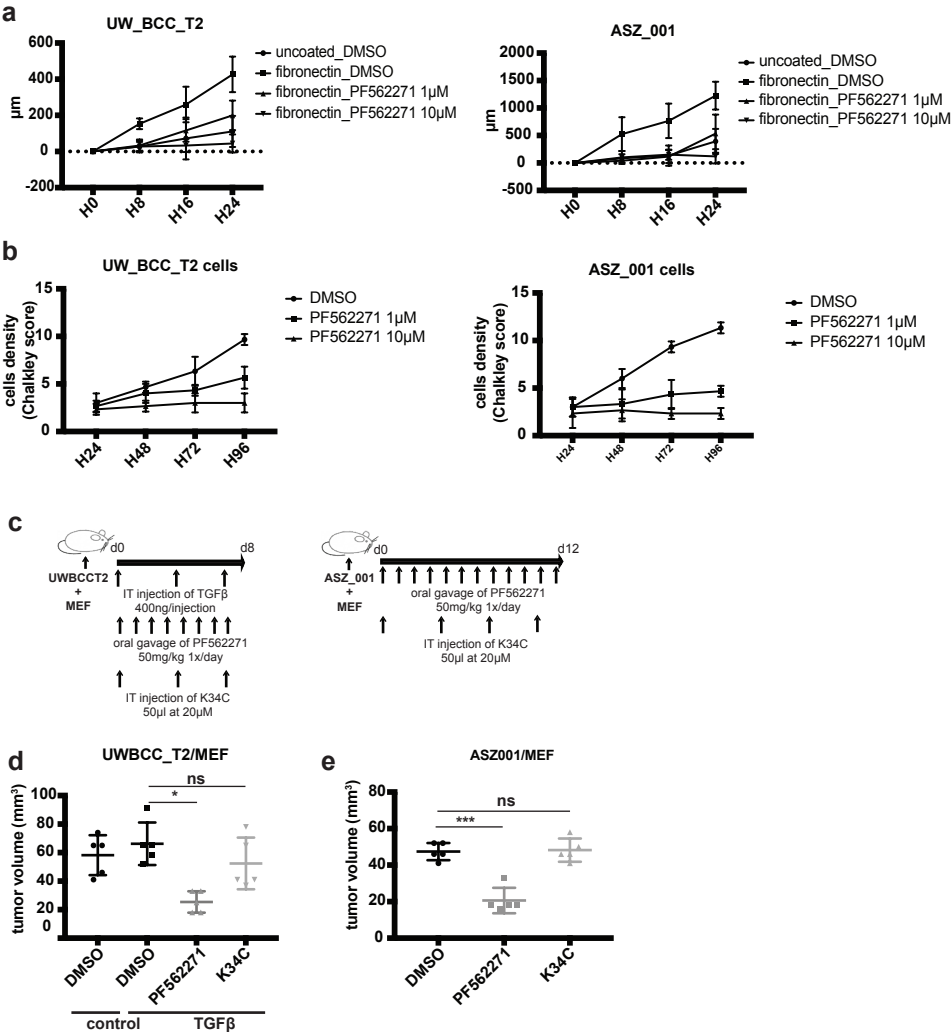

## SUPPLEMENTARY MATERIALS AND METHODS

**Antibodies.** FITC-conjugated mouse monoclonal anti-integrin  $\beta 1$  (MEM-101A), mouse monoclonal IgG1 isotype, rabbit monoclonal anti-integrin  $\alpha 5$  (EPR7854), rabbit monoclonal IgG isotype, mouse monoclonal anti-integrin  $\alpha 5$  blocking antibody (P1D6), mouse monoclonal IgG3 isotype, rabbit polyclonal anti-phospho-FAK (EP2160Y), rabbit polyclonal IgG isotype, rabbit polyclonal anti-fibronectin (ab2413), mouse monoclonal anti-N-cadherin (5D5) and rabbit monoclonal anti-cleaved Caspase 3 (5A1E) antibodies were all purchased from Abcam (Cambridge, MA). Rabbit monoclonal anti-phospho-FAK (31H5L17) and rabbit monoclonal anti-Ki67 (SP6) were purchased from ThermoFisher Scientific (Waltham, MA). Rabbit polyclonal anti-E-cadherin (20874-1-AP) antibody was obtained from Proteintech (Rosemont, IL). Rabbit polyclonal anti-S100A4 (HPA007973) antibody was obtained from Sigma-Aldrich (Buchs, Switzerland). Rabbit polyclonal anti-TGF $\beta$  (3711), rabbit polyclonal anti-phospho-FAK (3283) and anti-total FAK (3285) antibodies were obtained from Cell Signaling Technology (Beverly, MA). Mouse anti- $\beta$ -tubulin (E7) was purchased from Developmental Studies Hybridoma Bank (University of Iowa, IO). Goat anti-mouse AlexaFluor 546 and goat anti-rabbit Alexa 488 were purchased from BD Biosciences (Basel, Switzerland). Peroxidase anti-rabbit IgG was obtained from Vector Laboratories (Burlingame, CA).

**Proliferation assay.** For *in vitro* proliferation assay, cells were collected and seeded in 96-well-plates previously coated with fibronectin 0.5 mg/ml (Sigma-Aldrich, Buchs, Switzerland) at a concentration of 1000 cells/well in the absence or presence of anti-integrin  $\alpha 5$  blocking antibody (P1D6), anti-integrin  $\alpha 5\beta 1$  inhibitor K34C (provided by Dr. M. Dontenwil (Ray et al., 2014)) or FAK-inhibitor PF-562271 (MedKoo Biosciences, Chapel Hill, NC) as indicated. Cells were then fixed with 4% formaldehyde and stained with 0.5% crystal violet 24, 48, 72 and 96 hours after the seeding. Cell density was assessed using a 12-

point Chalkley eyepiece under a DM2000 Leica Microsystems microscope (Wetzlar, Germany) as previously described (Kuonen et al., 2012). The number of cells hit by the graticule points was recorded. For each well, the Chalkley score was calculated as the mean value of 3 random fields.

**Adhesion assay.**  $2.5 \times 10^4$  cells were collected and seeded in 96-well-plates previously coated over-night with BSA 10mg/ml (Sigma-Aldrich, Buchs, Switzerland), collagen I 1 mg/ml (Sigma-Aldrich, Buchs, Switzerland), or fibronectin 0.5 mg/ml. Cells were let adhere in serum-free conditions medium for 2 hours at 37°C in the absence or presence of anti-integrin  $\alpha 5\beta 1$  blocking antibody P1D6, anti-integrin  $\alpha 5\beta 1$  inhibitor K34C or FAK-inhibitor PF-562271 as indicated. At the end of the experiment, cells were washed with PBS, fixed with 4% formaldehyde and stained with 0.5% crystal violet solution. Cell density was calculated under a DM2000 Leica Microsystems microscope (Wetzlar, Germany) as the mean of cell number counted over 3 different 100x random fields per well.

**Wound healing assay.**  $5 \times 10^4$  cells were collected and seeded in tissue culture 96-well-plates previously coated over-night with fibronectin 0.5 mg/ml or not. At confluency, a wound was performed in each well of the plate and the healing monitored every 8 hours for 24 hours in the absence or presence of anti-integrin  $\alpha 5$  blocking antibody P1D6, anti-integrin  $\alpha 5\beta 1$  inhibitor K34C or FAK-inhibitor PF-562271 as indicated. Healing progression was measured using a graduated eyepiece under a DM2000 Leica Microsystems microscope (Wetzlar, Germany). Cell migration velocity was calculated as the distance traveled over the 24 hours of monitoring (expressed in  $\mu\text{m}/\text{hour}$ ).

**Immunohistochemistry and immunofluorescence.** Fibronectin (ab2413), S100A4 (HPA007973), phospho-FAK (31H5L17) and integrin  $\alpha 5$  (EPR7854) were stained using a standard immunohistochemistry protocol. Quantification of immunostaining was performed by Chalkley counting procedure using a 12-point eyepiece graticule as described in detail

earlier (Kuonen et al., 2012). The Chalkley count for an individual tumor was taken as the mean value of the three graticule counts measured over a minimum of 3 different random fields. For phospho-FAK (EP2160Y) *in vitro* immunofluorescence, cells were cultured on coverslips previously coated with either poly-L-lysine (Invitrogen, Basel, Switzerland) or fibronectin 0.5mg/ml. DAPI-containing mounting medium (ThermoFisher Scientific, Waltham, MA) was used to stain nuclei. Phospho-FAK intensity was expressed as the percentage of cells showing positive membranous staining under Zeiss LSM700, Axio Observer Z.1 confocal fluorescence microscope (Carl Zeiss AG, Germany). For each slide, the mean value of 3 random fields was recorded.

**Flow cytometry.** For flow cytometry on BCC cell lines, tumor cells were collected using PBS containing 5mM EDTA and filtered to form single-cell suspensions. Staining and acquisition were done as described previously (Kuonen et al., 2012). All samples were acquired with a 4-color FACS Calibur flow cytometer from BD Biosciences (San Jose, CA) and data analyzed using FlowJo LLC software (Ashland, OR).

**Real-time quantitative PCR.** RNA samples were obtained from adherent cells using RNeasy kit from QIAGEN (Basel, Switzerland) according to manufacturer's instructions. For *ex vivo* RNA extraction, fresh-frozen tumors were mechanically disrupted. RNA extraction was then performed using RNeasy kit from QIAGEN (Basel, Switzerland) according to manufacturer's instructions. Quantitative real-time PCR was performed using TaqMan assay human-specific or mouse-specific primers obtained from ThermoFisher Scientific (Waltham, MA). Each reaction was performed in triplicate and values were normalized to GAPDH.

**Western blotting.** Total cell lysates were resolved by SDS\_PAGE and blotted onto a nitrocellulose membrane (Whatman, 0.45  $\mu$ m, Sigma-Aldrich, Buchs, Switzerland). Membranes were blocked for 30 min at room temperature (RT) with 5% BSA blocking buffer, and incubated with a monoclonal anti-p-FAK (1:1000; 3283, Cell Signaling

Technology), anti-total FAK (1:1000; 3285, Cell Signaling Technology), anti-TGF $\beta$  (1:1000; 3711, Cell Signaling Technology) and anti- $\beta$ -tubulin (1:2000; E7, DSHB) antibodies overnight at 4°C. Membranes were visualized using Li-Cor system (ImageStudioLite software, Lincoln, OR). Signal intensity was quantified using ImageJ software (NIH; Bethesda, MA).

**Lentiviral constructs.** Murine TGF $\beta$ 1 silencing, murine and human FAK silencing and non-silencing shRNA sequences cloned into the pLKO.1-puro vector were purchased from Sigma-Aldrich (Buchs, Switzerland). All sequences are available online ([www.sigmaaldrich.com](http://www.sigmaaldrich.com)). Lentiviruses were produced in 293T cells using Lipofectamine LTX and Plus protocol (ThermoFisher Scientific, Waltham, MA) by co-transfecting the pLKO.1-puro constructs with pMD2G and psPAX2 plasmids. Infection of targeted cells was done by 1 hour centrifugation in the presence of 8 $\mu$ g/ml polybrene. Selection was started 48 hours after infection using 5 $\mu$ g/ml puromycin (Sigma-Aldrich, Buchs, Switzerland).

**TGF $\beta$  level in human samples.** For the quantification of TGF $\beta$  in human tumors, fresh-frozen tumors were first mechanically disrupted in Tissue Protein Extraction reagent from ThermoFisher Scientific (Waltham, MA). After centrifugation, supernatants were collected and TGF $\beta$  levels quantified using a cytometric bead array kit for human TGF $\beta$ 1 from BD Biosciences (San Jose, CA) following the manufacturer's instructions. TGF $\beta$  levels were normalized to the sample weight and expressed as pg/mg of sample.
